## Retraction

## Retraction of: Glypican-1-targeted and gemcitabine-loaded liposomes enhance tumor-suppressing effect on pancreatic cancer

Yu Mu<sup>1</sup>, Dezhi Wang<sup>2</sup>, Liangyu Bie<sup>1</sup>, Suxia Luo<sup>1</sup>, Xiaoqian Mu<sup>1</sup>, Yanqiu Zhao<sup>1</sup>

<sup>1</sup>Department of Oncology, Affiliated Cancer Hospital of Zhengzhou University, Henan Cancer Hospital, Zhengzhou, Henan Province, China

<sup>2</sup>East China Normal University, Shanghai, China

**Correspondence to:** Yanqiu Zhao; **email:** [16530907585@163.com](mailto:16530907585@163.com), <https://orcid.org/0000-0003-1106-8097>

**Keywords:** liposome, phosphatidylinositol proteosan-1, gemcitabine, orthotopic pancreatic cancer mice, pancreatic cancer

**Original article:** *Aging (Albany NY)* 2020; 12: pp 19585–19596

PMID: [33035197](https://pubmed.ncbi.nlm.nih.gov/33035197/)

PMCID: [PMC7732280](https://pubmed.ncbi.nlm.nih.gov/PMC7732280/)

doi: [10.18632/aging.103918](https://doi.org/10.18632/aging.103918)

**This article has been retracted:** Aging has completed its investigation of this paper. Several concerns were raised about this paper, including overlap with unrelated papers from different institutions. We found that a few tumor images in Figure 5B “GPC1-LP (GEM) inhibited tumor growth of the orthotopic pancreatic cancer mice” are duplications of tumor images in Figure 6A published earlier in an unrelated paper [1] and Figures 6B, 6b, 6B and 4G published in four more unrelated papers [2–5], some of which already have been retracted. In addition, Figure 1B “Cumulative drug release profiling of LP (GEM) and GPC1-LP (GEM) in phosphate-buffer saline (PBS, pH 7.4 and pH 5.0)” contains the same graph as unrelated paper [6]. The Scientific Integrity office at Aging contacted the authors and their institution. The authors confirmed that tumor images were inappropriately used and agreed with the Editorial decision to retract this paper. The Scientific Integrity office notified the authors’ Institutions about this retraction and added their names to an Editorial Warning list.

### REFERENCES

1. Tian K, Sun D, Chen M, Yang Y, Wang F, Guo T, Shi Z. Long Noncoding RNA X-Inactive Specific Transcript Facilitates Cellular Functions in Melanoma via miR-139-5p/ROCK1 Pathway. *Onco Targets Ther.* 2020; 13:1277–87. <https://doi.org/10.2147/OTT.S225661>  
PMID:[32103995](https://pubmed.ncbi.nlm.nih.gov/32103995/)  
Retraction in: *Onco Targets Ther.* 2021; 14:4999–5000. <https://doi.org/10.2147/OTT.S341757>  
PMID:[34675542](https://pubmed.ncbi.nlm.nih.gov/34675542/)
2. Wu K, Li L, Li L, Wang D. Long non-coding RNA HAL suppresses the migration and invasion of serous ovarian cancer by inhibiting EMT signaling pathway. *Biosci Rep.* 2020; 40:BSR20194496. <https://doi.org/10.1042/BSR20194496>  
PMID:[32039453](https://pubmed.ncbi.nlm.nih.gov/32039453/)  
Retraction in: *Biosci Rep.* 2021; 41:BSR-20194496\_RET. [https://doi.org/10.1042/BSR-20194496\\_RET](https://doi.org/10.1042/BSR-20194496_RET)  
PMID:[34515292](https://pubmed.ncbi.nlm.nih.gov/34515292/)
3. Zhao Y, Yin H, Zhang X. Modification of graphene oxide by angiopep-2 enhances anti-glioma efficiency of the nanoscaled delivery system for doxorubicin. *Aging (Albany NY).* 2020; 12:10506–16. <https://doi.org/10.18632/aging.103275>  
PMID:[32474457](https://pubmed.ncbi.nlm.nih.gov/32474457/)
4. Zheng W, Li ZY, Zhao DL, Li XL, Liu R. microRNA-26a Directly Targeting MMP14 and MMP16 Inhibits the Cancer Cell Proliferation, Migration and Invasion in Cutaneous Squamous Cell Carcinoma. *Cancer Manag Res.* 2020; 12:7087–95. <https://doi.org/10.2147/CMAR.S265775>  
PMID:[32848463](https://pubmed.ncbi.nlm.nih.gov/32848463/)

Retraction in: Cancer Manag Res. 2021; 13:7249–50. <https://doi.org/10.2147/CMAR.S339431>  
PMID:[34566433](https://pubmed.ncbi.nlm.nih.gov/34566433/)

5. Sha L, Ma D, Chen C. Exosome-mediated Hic-5 regulates proliferation and apoptosis of osteosarcoma via Wnt/ $\beta$ -catenin signal pathway. *Aging (Albany NY)*. 2020; 12:23598–608.  
<https://doi.org/10.18632/aging.103546>  
PMID:[33310972](https://pubmed.ncbi.nlm.nih.gov/33310972/)
6. Zhang X, Chen W, Bai J, Jin L, Kang X, Zhang H, Wang Z. Pluronic P123 modified nano micelles loaded with doxorubicin enhanced tumor-suppressing effect on drug-resistant breast cancer cells. *Aging (Albany NY)*. 2020; 12:8289–300.  
<https://doi.org/10.18632/aging.103138>  
PMID:[32396524](https://pubmed.ncbi.nlm.nih.gov/32396524/)
